# Supplementary material for: No Difference in Tolerance between Wheat and Spelt Bread in Patients with Suspected Non-Celiac Wheat Sensitivity
Source: MDPI journal article supplement (doi:10.3390/nu14142800), 2022-07-07
Supplement: s1 [file s1]

## Supplements

Table S1. Composition of the wheat and spelt breads

| Name    | Grain       | Flour type | Dough       | Improver [g] | Flour [g] | Yeast [g] | Salt [g] | Water [g] | Fermentation time |
|---------|-------------|------------|-------------|--------------|-----------|-----------|----------|-----------|-------------------|
| Spelt T | Spelt wheat | 630        | Yeast dough | -            | 5000      | 125       | 100      | 3500      | 16 h at 4°C       |
| Spelt C | Spelt wheat | 630        | Yeast dough | 125          | 3500      | 125       | 100      | 3500      | 1 h at 20°C       |
| Wheat T | Bread wheat | 550        | Yeast dough | -            | 5000      | 125       | 100      | 3500      | 16 h at 4°C       |
| Wheat C | Bread wheat | 550        | Yeast dough | 125          | 3500      | 125       | 100      | 3500      | 1 h at 20°C       |

Abbreviations: T, traditional recipe; C, current recipe.

Table S2. Content of nutrients, gluten and FODMAPs

|                   | Gluten g/100g | Polyols g/100g | Excess Fructose g/100g | Oligosaccharides g/100g | Energy KJ/100g | Protein g/100g | Fat g/100g | Carbohydrate g/100g |
|-------------------|---------------|----------------|------------------------|-------------------------|----------------|----------------|------------|---------------------|
| GF Bread          | <0.05         | 0.52           | 0.08                   | 0.62                    | 841.3          | 4.1            | 1.3        | 38.91               |
| GF Bread + Gluten | 4.8           | 0.65           | 0.09                   | 0.69                    | 979.7          | 6.5            | 1.6        | 41.55               |
| GF Bread + FODMAP | <0.05         | 0.30           | 1.81                   | 5.15                    | 922.5          | 4.1            | 1.3        | 43.21               |
| Spelt bread T     | 5.3           | 0.36           | 0.00                   | 0.39                    | 1107.1         | 7.5            | 1.3        | 48.18               |
| Spelt bread C     | 5.7           | 0.17           | 0.12                   | 0.56                    | 1065.3         | 7.3            | 1.1        | 48.41               |
| Wheat bread T     | 5.6           | 0.32           | 0.06                   | 0.40                    | 1029.1         | 7.1            | 0.9        | 47.06               |
| Wheat bread C     | 5.8           | 0.27           | 0.18                   | 1.14                    | 1060.1         | 7.3            | 1.1        | 48.42               |

For abbreviations, see Figure S2.

Table S3. Systemic symptoms are assessed by Illness Perception Questionnaire (IPQ). Shown are the numbers of affected individuals who suffered from the corresponding symptoms after each bread.

|                       | Baseline<br>n=24 | +Gluten<br>n=24 | +FODMAP<br>n=24 | Spelt bread<br>T n=24 | Spelt bread<br>C n=24 | Wheat<br>bread T<br>n=24 | Wheat<br>bread C<br>n=24 | Wash out<br>Ø n=24 |
|-----------------------|------------------|-----------------|-----------------|-----------------------|-----------------------|--------------------------|--------------------------|--------------------|
| Pain                  | 18               | 10              | 9               | 14                    | 10                    | 10                       | 12                       | 10                 |
| Sore Throat           | 3                | 1               | 0               | 1                     | 0                     | 0                        | 0                        | 0                  |
| Nausea                | 13               | 5               | 3               | 4                     | 3                     | 3                        | 5                        | 3                  |
| Breathlessness        | 3                | 2               | 1               | 0                     | 2                     | 2                        | 1                        | 0                  |
| Weight Loss           | 3                | 0               | 0               | 1                     | 2                     | 3                        | 2                        | 0                  |
| Fatigue               | 8                | 6               | 4               | 3                     | 5                     | 5                        | 4                        | 3                  |
| Stiff Joints          | 5                | 2               | 0               | 2                     | 3                     | 5                        | 2                        | 0                  |
| Sore Eyes             | 2                | 1               | 1               | 1                     | 2                     | 1                        | 0                        | 0                  |
| Wheeziness            | 3                | 1               | 1               | 0                     | 2                     | 0                        | 2                        | 0                  |
| Headaches             | 10               | 3               | 6               | 3                     | 6                     | 3                        | 6                        | 3                  |
| Upset Stomach         | 18               | 14              | 11              | 16                    | 12                    | 11                       | 15                       | 10                 |
| Sleep<br>Difficulties | 6                | 3               | 2               | 2                     | 2                     | 5                        | 6                        | 1                  |
| Dizziness             | 5                | 1               | 2               | 2                     | 3                     | 1                        | 3                        | 0                  |
| Loss of<br>Strength   | 9                | 5               | 3               | 3                     | 4                     | 3                        | 2                        | 2                  |

For abbreviations, see Figure S2.

Table S4. Fecal levels of calprotectin and lactoferrin as well as concentrations of ferritin and lipase in the serum of the participants.

|                      | Baseline    | +Gluten     | +FODMAP     | Spelt T    | Spelt C    | Wheat T    | Wheat C    | P-Value |
|----------------------|-------------|-------------|-------------|------------|------------|------------|------------|---------|
| Calprotectin [mg/kg] | 20.4±17.5   | 30.4±46.8   | 16.6±5.35   | 20.6±14.1  | 32.0±57.5  | 29.5±44.7  | 19.9±12.2  | 0.371   |
| Lactoferrin [mg/l]   | 2.0±0.2     | 2.0±0.0     | 2.0±0.0     | 2.3±1.3    | 2.0±0.2    | 2.2±1.0    | 2.1±0.5    | 0.575   |
| Lipase [U/l]         | 33.8±8.2    | 30.7±9.2    | 32.5±14.6   | 32.5±11.0  | 34.0±9.5   | 32.8±9.3   | 31.1±10.5  | 0.571   |
| Ferritin [µg/l]      | 103.9±136.7 | 102.5±131.5 | 114.3±155.3 | 94.9±115.1 | 92.7±121.4 | 88.8±107.4 | 89.5±105.8 | 0.081   |

Statistics by ordinary one-way ANOVA/Tukey. For abbreviations, see Figure S2.

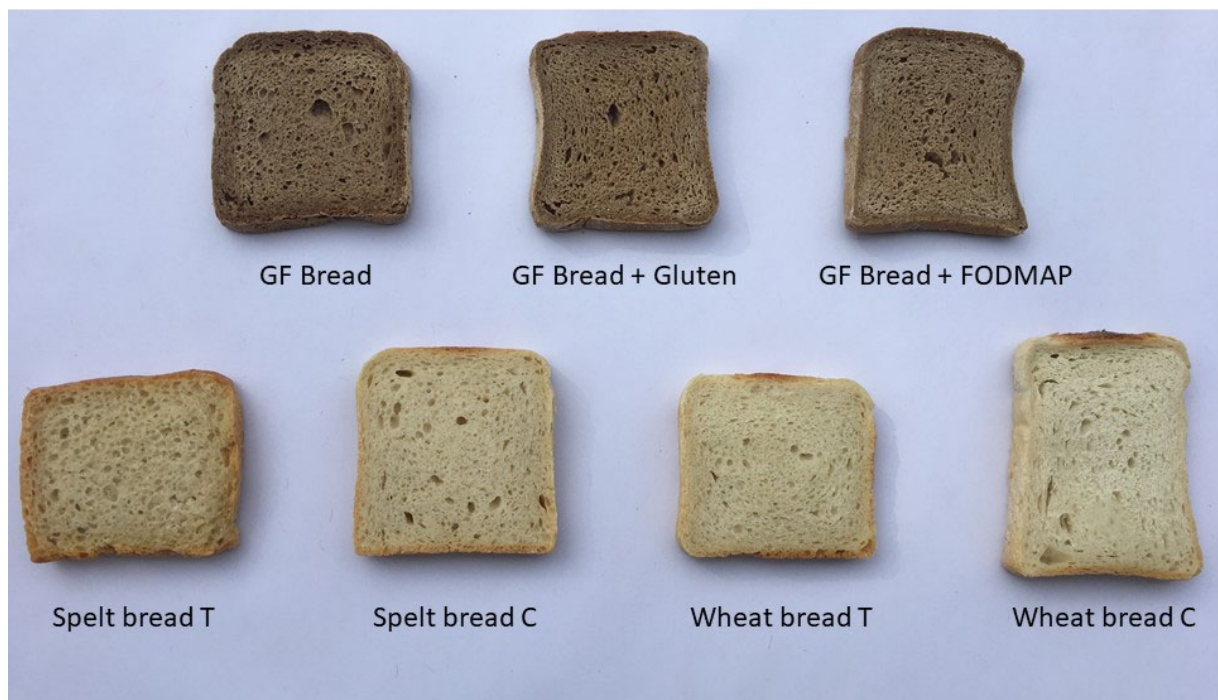

Figure S1. Gluten-free bread and study breads. Abbreviations: GF, gluten-free; FODMAP, fermentable oligo-, di-, monosaccharides and polyols; T, traditional manufacturing; C, current manufacturing.

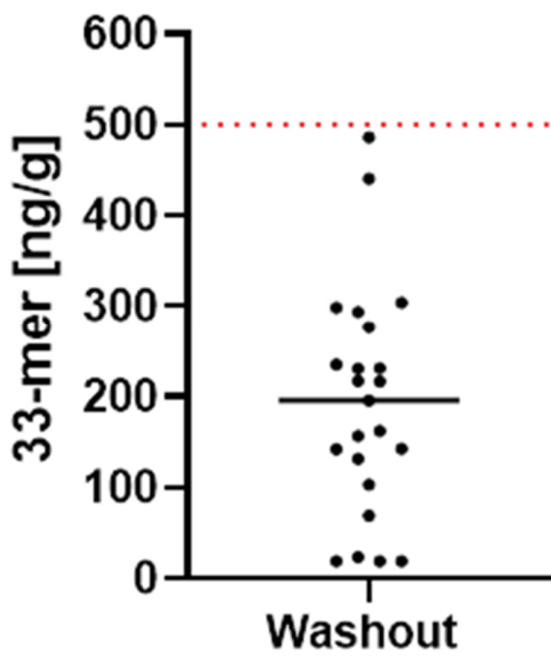

Figure S2. Fecal levels of 33-mer peptides. Measurement was performed after the washout phase after the +FODMAP bread (10 days of gluten-free diet).
